# Supplementary material
Source: PubMed Central journal article supplement (PMC5130624)
Supplement: NIHMS826216-supplement.pdf [file NIHMS826216-supplement.pdf]

Supplementary Fig. S1

A

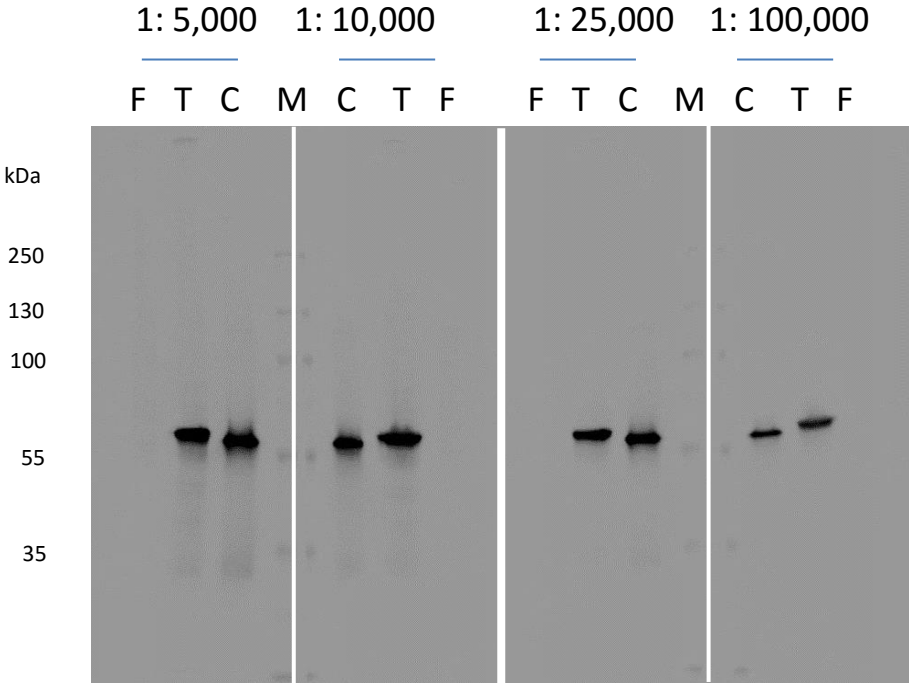

**B**

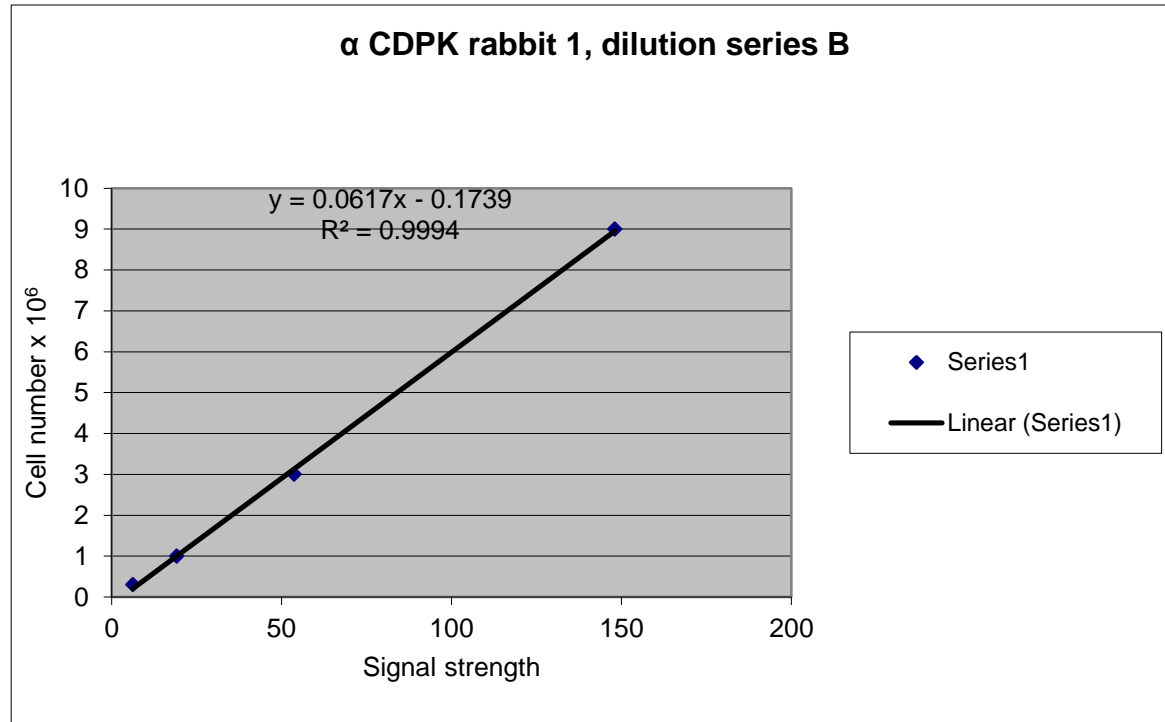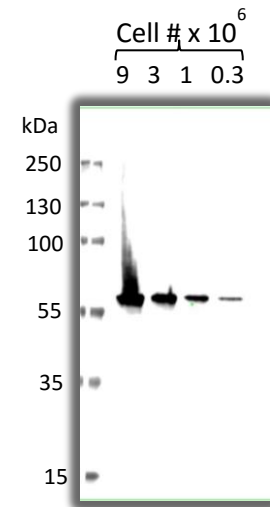

C

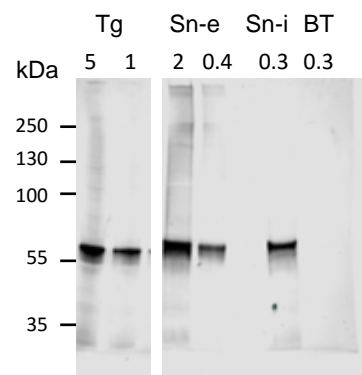

## Supplementary Fig. S2

### A

```

gi | 12484153 | gb | AAG53993.1 | AF333958_1    ---MGQQESTLG-----GAAGEPRSRGHAAGTSGGPGDHLHATPGMFVQHSTAI    46
SN3_02800495    ---MGQQESTLASTSPTAAHQSSGPGGERLRSGGGTAGGGGADDKHLHATPGMFVQHSTAV    57
SRCN_3314_SN1    MSAAGDRASPY-VSAPLASQKSLRP-----STDVETHRETFCVSLSPSLCTYTHMYT    52
          *: . *          . .          : :* . : .

gi | 12484153 | gb | AAG53993.1 | AF333958_1    FSDRYKQQRVLGKGSFGEVILCKDKITGQECVAVKVISKRQVKQKTDKESLLREVQLLKQL    106
SN3_02800495    FSDRYKQQRVLGKGSFGEVILCKDKITGQECVAVKVISKRQVKQKTDKESLLREVQLLKQL    117
SRCN_3314_SN1    YVRGYKQQRVLGKGSFGEVILCKDKITGQECVAVKVISKRQVKQKTDKESLLREVQLLKQL    112
          :      *****

gi | 12484153 | gb | AAG53993.1 | AF333958_1    DHPNIMKLYEFFEDKGYFYLVGVEVYTGGEFDEIISRKRFEVDAARIIRQVLSGITVMH    166
SN3_02800495    DHPNIMKLYEIFEDRGYYLVGVEVYCGGEFDEIISRKRFEVDAARIIRQVLSGITVMH    177
SRCN_3314_SN1    DHPNIMKLYEIFEDRGYYLVGVEVYCGGEFDEIISRKRFEVDAARIIRQVLSGITVMH    172
          *****:*:*:*:*:*:* *****

gi | 12484153 | gb | AAG53993.1 | AF333958_1    KNKIVHRDLKPENLLESKSKDANIRIIDFGLSTHFEASKMKDKIGTAYYIAPEVLHGT    226
SN3_02800495    KNKVVHRDLKPENLLESKSKDANIRIIDFGLSTHFEASKMKDKIGTAYYIAPEVLHGT    237
SRCN_3314_SN1    KNKVVHRDLKPENLLESKSKDANIRIIDFGLSTHFEASKMKDKIGTAYYIAPEVLHGT    232
          ***:*****

gi | 12484153 | gb | AAG53993.1 | AF333958_1    YDEKCDVWSTGVILYILLSGCPPFNAGANEYDILKKVEKGKGYTFELPQWKKVSESADLIR    286
SN3_02800495    YDEKCDVWSTGVILYILLSGCPPFNAGADEYEILKKVEKGKGYTFELPQWKKVSESADLIR    297
SRCN_3314_SN1    YDEKCDVWSTGVILYILLSGCPPFNAGADEYEILKKVEKGKGYTFELPQWKKVSESADLIR    292
          *****:*:*:*:*:*:* *****

gi | 12484153 | gb | AAG53993.1 | AF333958_1    KMLTYVPSMRISARDALDHEWVQTYGKEQATVDVPSLDNALNLNIRQFGTQKLSQAALLY    346
SN3_02800495    KMLTYVPSMRISARDALDHEWVQTYGKEQATVDVPSLDNALNLNIRQFGTQKLSQAALLY    357
SRCN_3314_SN1    KMLTYVPSMRISARDALDHEWVQTYGKEQATVDVPSLDNALNLNIRQFGTQKLSQAALLY    352
          *****:*:*:*:*:*:* *****

gi | 12484153 | gb | AAG53993.1 | AF333958_1    MGSKLTSQDETKELTAIFHRMDKNGDGLDRAELIEGYKELMRMKGQDASMLDASAVEHE    406
SN3_02800495    MGSKLTSKEETRELSAIFHRMDKNGDGLDRAELIEGYKELLRKLGQDASLLDQSAVEYE    417
SRCN_3314_SN1    MGSKLTSKEETRELSAIFHRMDKNGDGLDRAELIEGYKELLRKLGQDASLLDQSAVEYE    412
          *****:*:*:*:*:*:* *****

gi | 12484153 | gb | AAG53993.1 | AF333958_1    VDQVLDVAVDFDKNGYIEYSEFVTVAMDRKTLRSRERLERAFRMDADNSGKISSAELATI    466
SN3_02800495    VDQVLEAVDFDKNGFYGYSEFVTVAMDRKSLRSRERLERAFKMFADADNSGKISSAELATI    477
SRCN_3314_SN1    VDQVLEAVDFDKNGFYGYSEFVTVAMDRKSLRSRERLERAFKMFADADNSGKISSAELATI    472
          *****:*:*:*:*:*:* *****

gi | 12484153 | gb | AAG53993.1 | AF333958_1    FGVSDVDSETWKSVLSEVDKNNNDGEVDFDEFQMLLKLKCGN-----    507
SN3_02800495    FGVSDIDSETWKAVLAEVDRNNDGEVDFGFEQMLLKLKCDENATKKR    524
SRCN_3314_SN1    FGVSDIDSETWKAVLAEVDRNNDGEVDFGFEQMLLKLKCDENATKKR    519
          *****:*:*:*:*:*:* *****

```

**B**

|              |                                                                                                                                         |     |
|--------------|-----------------------------------------------------------------------------------------------------------------------------------------|-----|
| SnCDPK1      | MGQEQSTLASTSPTAAHQSSGPGGERLRSGGGTAGGGGADDKLHATPGMFMVQHSTAVFSD                                                                           | 60  |
| TGME49_CDPK1 | MGQEQSTLG-----GAAGEPRSRGHAAGTSGGPGDHLHATPGMFMVQHSTAI FSD<br>***:***. * .** * :. .** *:*****:***                                         | 49  |
| SnCDPK1      | RYKGQRVLGKGSFGEVILCKDKITGQECAVKVISKRQVKQKTDKESLLREVQLLKQLDHP                                                                            | 120 |
| TGME49_CDPK1 | RYKGQRVLGKGSFGEVILCKDKITGQECAVKVISKRQVKQKTDKESLLREVQLLKQLDHP<br>*****:*****:*****:*****:*****:*****:*****:*****:*****:*****:*****:***** | 109 |
| SnCDPK1      | NIMKLYEIFEDRGYYLVEVYCGGELFDEIISRKRFEVDAARIIRQVLSGITYMHNK                                                                                | 180 |
| TGME49_CDPK1 | NIMKLYEFEDKGYFYLVEVYTGELFDEIISRKRFEVDAARIIRQVLSGITYMHNK<br>*****:***:***:***** *****:*****:*****:*****:*****:*****:*****:*****          | 169 |
| SnCDPK1      | VVHRDLKPENLLESKSKDANIRIIDFGLSTHFEASKMKDKIGTAYYIAPEVLHGTYDE                                                                              | 240 |
| TGME49_CDPK1 | IVHRDLKPENLLESKSKDANIRIIDFGLSTHFEASKMKDKIGTAYYIAPEVLHGTYDE<br>:*****:*****:*****:*****:*****:*****:*****:*****:*****:*****:*****        | 229 |
| SnCDPK1      | KCDVWSTGVILYILLS-----                                                                                                                   | 256 |
| TGME49_CDPK1 | KCDVWSTGVILYILLSGESVPRSAFPVSPRSSSFCSSSSFCSPGLPVYLQKREIKSCVA<br>*****:*****:*****:*****:*****:*****:*****:*****:*****:*****:*****        | 289 |
| SnCDPK1      | -----GCPPFNGADEYEILKKVEKGKTYFELPQW                                                                                                      | 285 |
| TGME49_CDPK1 | FYVGMQRDACALTYLGTQDARAGAFFPDEKFRCPFFNGANEYDILKKVEKGKTYFELPQW<br>*****:***:*****:*****:*****:*****:*****:*****:*****:*****:*****         | 349 |
| SnCDPK1      | KKVSESADLIRKMLTYVPSMRI SARDALDHEWVQTYGKEQATVDVPSLDNALNIRQFQ                                                                             | 345 |
| TGME49_CDPK1 | KKVSESADLIRKMLTYVPSMRI SARDALDHEWIQTYTKEQISVDVPSLDNALNIRQFQ<br>*****:*****:*****:*****:*****:*****:*****:*****:*****:*****:*****        | 409 |
| SnCDPK1      | GTQKLSQAALLYMGSKLTSKEETRELSAIFHRMDKNGDGLDRAELIEGYKELRLKGGQD                                                                             | 405 |
| TGME49_CDPK1 | GTQKLAQAALLYMGSKLTSQDETRELTAIFHKMDKNGDGLDRAELIEGYKELMRMKGQD<br>*****:*****:*****:***:***:*****:*****:*****:*****:*****:*****:*****      | 469 |
| SnCDPK1      | ASLLDQSAVEYEVDQVLEAVDFDKNGFIGYSEFVTVAMDRKSLLSRERLERAFKMFADAN                                                                            | 465 |
| TGME49_CDPK1 | ASMLDASAVEHEVDQVLDVDFDKNGYIEYSEFVTVAMDRKTLRSRERLERAFRFDSDN<br>**:* *****:*****:*****:*****:*****:*****:*****:*****:*****:*****:***:**   | 529 |
| SnCDPK1      | SGKISSAELATIFGVSDIDSETWKAVALAEVDRNNDGEVDFGEFQEMLLKLCDENATKKR*                                                                           | 524 |
| TGME49_CDPK1 | SGKISSTELATIFGVSDVDSETWKSVLSEVDKNNNDGEVDFDEFQQLLKLKCGN*-----<br>*****:*****:*****:***:***:***** *****:***** :                           | 582 |

**C**

|         |                                                                       |     |
|---------|-----------------------------------------------------------------------|-----|
| Sn3     | MGQEQSTLASTSPTAAHQSSGPGGERLRSGGGTAGGGGADDKLHATPGMFVQHSTAVFSD          | 60  |
| TgCDPK1 | MGQQESTLG-----GAAGEPRSRGHAAAGTSGGPGDHLHATPGMFVQHSTAI FSD              | 49  |
|         | ***.:***. * .** * .: .** * :*****:***                                 |     |
| Sn3     | RYKQRVLGKGSFGEVILCKDKITGQECVAVKVISKRQVKQKTDKESLLREVQLLKQLDHP          | 120 |
| TgCDPK1 | RYKQRVLGKGSFGEVILCKDKITGQECVAVKVISKRQVKQKTDKESLLREVQLLKQLDHP          | 109 |
|         | *****:***:***:*****                                                   |     |
| Sn3     | NIMKLYEIFEDRGYYLVGEVYCGGELFDEIISRKR FSEVDAARIIRQVLSGIT YMHKNK         | 180 |
| TgCDPK1 | NIMKLYEFFEDKGYFYLVGEVYTGELFDEIISRKR FSEVDAARIIRQVLSGIT YMHKNK         | 169 |
|         | *****:***:***:*****                                                   |     |
| Sn3     | VVHRDLKPENLLLESKSKDANIRIIDFGLSTHFEASKMMKDKIGT <b>NGPHFAAAVGVAAAA</b>  | 240 |
| TgCDPK1 | IVHRDLKPENLLLESKSKDANIRIIDFGLSTHFEASKMMKDKIGT-----                    | 214 |
|         | :*****                                                                |     |
| Sn3     | <b>AAIRVAAAVGVVATAVGLAAA AVDVAATVDVASAALGVVLLVLETERPW</b> AYYIAPEVLH  | 300 |
| TgCDPK1 | -----AYYIAPEVLH                                                       | 224 |
|         | *****                                                                 |     |
| Sn3     | GTYDEKCDVWSTGVILYILLS-----                                            | 321 |
| TgCDPK1 | GTYDEKCDVWSTGVILYILLS <b>GESVPRSAFPVSPRSSSSFCSSSSFCSPGLPVYLQKREI</b>  | 284 |
|         | *****                                                                 |     |
| Sn3     | -----GCPPFNGADEYEILKKVEKGK YTF                                        | 345 |
| TgCDPK1 | <b>KSCVAFYVGMQORDACALIYLGTDARAGAFFPDEKH</b> RCPPFNGANEYDILKKVEKGK YTF | 344 |
|         | *****:***:*****                                                       |     |
| Sn3     | ELPQWKKVSESAKDLIRKMLTYVPSMRISARDALDHEWVQTYGKEQATVDVPSLDNAILN          | 405 |
| TgCDPK1 | ELPQWKKVSESAKDLIRKMLTYVPSMRISARDALDHEW IQTYTKEQISVDVPSLDNAILN         | 404 |
|         | *****:***:***:*****                                                   |     |
| Sn3     | IRQFQGTQKLSQAALLYMGSKLTSKEETRELSAIFHRMDKNGDQQLDRAELIEGYKELLR          | 465 |
| TgCDPK1 | IRQFQGTQKLAQAALLYMGSKLTSQDET KELTAIFHKMDKNGDQQLDRAELIEGYKELMR         | 464 |
|         | *****:*****:***:***:*****:*****:***:***:*****:***                     |     |
| Sn3     | LKGQDASLLDQSAVEYEVDQVLEAVDFDKNGFIGYSEFVTVAMDRKSLLSRERLERAFKM          | 525 |
| TgCDPK1 | MKGQDASMLDASAVEHEVDQVLDVAVDFDKNGYIEYSEFVTVAMDRKTL LSRERLERAFRM        | 524 |
|         | :*****:***:***:*****:*****:***:*****:*****:***:*****:***              |     |
| Sn3     | FDADNSGKISSAELATIFGVSDIDSETWKAVLAEVDRNNDGEVDFGEFQEMLLKLC DENA         | 585 |
| TgCDPK1 | FDSDNSGKISSTELATIFGVSDVDSETWKS VLSEVDKNNDGEVDFDEFQ QMLLKL CGN--       | 582 |
|         | **.:*****:*****:*****:***:***:*****:***:*****:                        |     |
| Sn3     | TKKR                                                                  | 589 |
| TgCDPK1 | ----                                                                  | 582 |
